# Supplementary material for: Upper extremity deep vein thrombosis in COVID-19: Incidence and correlated risk factors in a cohort of non-ICU patients
Source: PLoS One. 2022 Jan 12;17(1):e0262522. doi: 10.1371/journal.pone.0262522 (PMC8754283; doi:10.1371/journal.pone.0262522)
Supplement: S1 Database — (XLS) [file pone.0262522.s002.xls]

## Sheet: Sheet1
ID	age	sex	hf	bpco	dm	hta	stroke	dementia	bmiover30	pneumonia	ards	thrombophilia	cancer	UEDVT	SVT	mono_ax	bi_ax	mono_ceph	bi_ceph	mono_bas	bi_bas	distal_sup	mono_dvt	bi_dvt	mono_subcl	bi_sub	csvtCVCsup	cdvtCVCprof	TrombosiCVC	CPAP	days_helmet	days_hosp	cus_adm	Symptomps	upper_edema	ddimer	kg	creat	gfr	hb	gr	gb	neu	linf	mono	plt	pcr	UEVT	p_f
1	85	1	2	1	2	1	1	2	1	1	1	1	1	0	1	1	1	1	1	2	1	2	1	1	1	1	1	1	0	0	0	6	5	0	1	933											10.1	2	391
2	66	1	1	1	1	2	1	1	1	2	1	1	1	0	1	1	1	1	1	1	1	2	1	1	1	1	2	1	1	0	0	16	10	0	1	8728		1.08		13.1	4.2	6	73.1	15.9	9.7	253000	9.84	2	308
3	69	1	1	2	1	1	1	1	1	2	2	1	1	0	1	1	1	1	1	1	1	2	1	1	1	1	1	1	0	1	9	9	7	1	2	470		0.96		13.4	4.07	13.4	90	4.5	5.3	275000	21.3	2	206
4	73	1	2	1	1	2	1	1	1	2	2	1	1	0	1	1	1	2	1	1	1	1	1	1	1	1	1	1	0	1	8	27	7	1	2	2848		0.67		13.7	4.22	4.1	60.6	19.3	17.1	126000	8.3	2	221
5	73	1	1	1	1	2	1	1	1	2	2	1	1	0	1	1	1	1	1	2	1	1	1	1	1	1	1	2	1	1	25	25	7	0	1	6506		0.86		12.6	4.12	7.2	84.7	11.6	3.4	272000	21.2	2	212
6	68	1	1	1	1	2	1	1	1	2	1	1	1	1	1	2	1	1	2	2	1	2	1	1	1	1	1	2	1	1	15	27	11	1	2			0.74		14.1	4.6	9.6	86.1	9.7	4	267000	10.5	2	261
7	78	1	1	1	1	2	1	1	1	2	1	1	1	0	0	1	1	1	1	1	1	1	1	2	1	1	1	1	0	1	7	11	6	1	2	462		1.06		15.8	4.6	3	74.3	14.2	10.7	102000	9.93	2	299
8	59	1	1	1	1	1	1	1	1	2	2	1	1	1	0	2	1	1	1	1	1	1	2	1	1	1	1	2	1	1	19	25	10	1	2	5811		0.79		14.7	4.57	7.3	89.2	7.7	2.7	119000	9.93	2	261
9	67	2	1	1	1	1	1	1	1	2	1	1	1	0	1	1	1	2	1	1	1	1	1	1	1	1	1	1	0	0	0	35	6	0	1	763		0.72		10.9	3.72	12.5	79.7	11.9	7.2	722000	16.4	2	248
10	48	1	1	1	1	1	1	1	1	2	2	1	1	0	1	1	1	1	1	2	1	1	1	1	1	1	1	1	0	1	17	21	6	1	2	236		0.86		15.4	4.84	8.2	79.3	9.7	9.6	224000	6.8	2	247
11	77	2	1	1	1	2	1	2	1	2	1	1	1	0	1	1	1	1	1	1	1	2	1	1	1	1	1	1	0	0	0	24	20	0	1	572		0.5		13.6	4.6	8	68.5	17.5	11.3	289000	1.49	2	333
12	65	1	2	1	1	1	1	1	2	2	2	1	1	1	0	2	1	1	1	1	1	1	1	1	1	1	1	2	1	1	3	5	4	0	1	943		0.78		12.6	4.13	12.3	95	3	1.9	205000	14.9	2	171
13	80	1	1	1	1	1	1	1	1	2	2	1	1	1	1	1	2	1	2	1	2	1	1	2	1	1	1	1	0	1	8	8	5	1	2		90	0.78	96.15	14.7	4.27	15.8	89.1	6.4	4.2	104000	10.5	2	214
14	86	2	1	1			1	2	2	2	2	1	1	0	1	1	1	1	1	2	1	1	1	1	1	1	1	1	0	1	1	13	7	0	1	5306		1.03		12.3	3.92	16.1	84	10.5	5.3	228000	7.5	2	154
15	69	1	1	1	1	2	1	1	1	2	2	1	1	1	0	1	2	1	1	1	1	1	2	1	1	1	1	1	0	1	16	31	7	1	2	607		0.83		13.4	4.48	10	83.8	6.9	8	408000	11	2	255
16	75	1	1	1	1	1	1	1	1	2	2	1	1	0	1	1	1	2	1	1	1	1	1	1	1	1	1	1	0	1	20	28	8	0	1	5821		0.95		14.2	4.79	10	84.4	9.5	4	343000	33.6	2	126
17	66	1	2	1	1	2	1	1	1	2	2	1	1	1	1	1	2	1	1	1	2	1	1	2	1	1	1	1	0	1	12	12	7	1	2	40515	78	0.8	100.21	14.3	4.42	7.2	82	15.2	2.7	179000	10.2	2	159
18	71	2	1	1	2	2	1	1	1	2	2	1	1	1	0	1	1	1	1	1	1	1	1	1	2	1	1	1	0	1	7	21	10	0	1	2116		0.64		12.1	4.21	7.3	49.8	32.2	16	283000	4.9	2	332
19	85	2	1	1	1	2	1	1	1	2	2	1	1	1	0	2	1	1	1	1	1	1	1	1	1	1	1	2	1	1	15	57	7	0	1	338		0.67		12.1	4.1	7.5	76.5	14.7	8.7	316000	11.5	2	204
20	79	2	1	1	1	2	1	1	1	2	1	1	1	1	1	2	2	1	2	1	1	1	1	1	1	1	1	1	0	0	0	36	5	0	1	804		0.66		12.1	4.15	7.7	75.3	13.1	10.3	304000	11.2	2	302
21	53	1	1	1	1	1	1	1	1	2	1	1	1	1	1	1	2	1	1	1	2	1	1	2	1	1	1	1	0	1	10	21	4	0	1	35181		0.96		13.6	4.14	9.6	86.5	5.9	5.1	311000	30.2	2	347
22	82	1	1	1	1	2	1	1	1	2	2	1	1	0	1	1	1	1	1	1	2	1	1	2	1	1	1	1	0	1	10	27	8	1	2	37507		0.65		13.7	4.33	8.1	87.1	8.8	3.6	292000	17.7	2	248
23	61	1	1	1	1	2	1	1	1	2	1	1	1	0	1	1	1	1	1	2	1	1	1	1	1	1	1	1	0	1	23	30	8	0	1			1.02		14.5	4.55	12.8	65.5	18.7	14.4	248000	23.2	2	315
24	57	1	1	1			1	1	2	2	2	1	1	0	1	1	1	1	1	2	1	1	1	1	1	1	2	1	1	1	4	9	7	0	1	489		0.82		13	3.92	5	65	22.8	11.2	235000	2.8	2
25	83	1	2	1	1	2	1	1	1	2	1	1	1	1	1	2	1	1	1	2	1	1	1	1	1	1	1	2	1	0	0	21	10	0	1	13918		0.9		12.8	4.06	3.7	69.7	21	9	141000	6.45	2	86
26	74	2	1	1			1	1	1	2	2	1	1	0	1	1	1	1	1	2	1	1	1	1	1	1	2	1	1	1	5	24	10	1	1	508												2
27	60	1	1	2	2	2	1	1	2	2	2	1	1	0	1	1	1	1	2	1	1	1	1	1	1	1	1	2	1	1	11	21	7	1	2	667		1.04		16.1	5.14	6.7	86.9	6.5	6.2	229000	18.1	2	218
28	79	1	1	1	2	2	1	1	1	2	1	1	1	0	1	1	1	1	1	1	1	1	1	2	1	1	1	1	0	1	7	7	5	0	1	33401		1.68		14.2	4.67	17	90.8	2.7	6.3	300000	27.6	2	33
29	72	1	1	2	2	2	1	1	1	1	2	1	1	0	1	1	1	1	1	1	1	1	1	2	1	1	1	2	1	1	15	9	6	1	2	414		0.8		14.9	4.46	6.8	80	11	8.8	202000	9.95	2	184
30	60	1	1	1	1	2	1	1	1	2	2	1	1	0	1	1	1	1	1	1	2	1	1	1	1	1	1	1	0	1	10	14	7	0	1	563		0.62		12.8	4.15	4.7	61.8	26.2	10.8	231000	15.6	2	234
31	62	1	1	1			1	1	1	2	2	1	1	1	0	2	1	2	1	2	1	1	2	1	1	1	1	1	0	1	13	13	10	0	1	1998												2
32	78	1	1	1	2	1	1	1	1	2	1	1	1	0	0	1	1	1	1	1	1	1	1	1	1	1	1	1	0	0	0	15	8	0	1	512		0.77		11.6	3.6	6	81.9	8.6	8.9	365000	18.8	1	281
33	69	1	2	1	1	2	1	1	2	2	1	1	1	0	0	1	1	1	1	1	1	1	1	1	1	1	1	1	0	1	16	20	4	1	2			0.89		14.2	4.74	7.2	73.7	20	6.1	410000	7.66	1	231
34	59	1	1	1	1	2	1	1	1	2	1	1	1	0	0	1	1	1	1	1	1	1	1	1	1	1	1	1	0	1	4	27	5	0	1	1259		0.74		15.1	4.81	6.9	74.6	17.5	7.6	247000	3.3	1	312
35	52	2	1	1	1	1	1	1	1	1	1	1	2	0	0	1	1	1	1	1	1	1	1	1	1	1	1	1	0	0	0	5	4	1	1	151	63	0.55	119	9.7	3.13	5.2	83.7	11.3	4.6	127000	0.66	1	362
36	77	1	2	2	2	2	1	1	1	2	2	1	1	0	0	1	1	1	1	1	1	1	1	1	1	1	1	1	0	1	18	26	5	1	2	332	98	1	85.75	12.8	4.1	6	82.4	11.1	6.4	159000	10.4	1	307
37	73	1	1	1	2	2	1	1	1	2	1	1	1	0	0	1	1	1	1	1	1	1	1	1	1	1	1	1	0	0	0	14	6	0	1			0.76		12.7	4.27	11.1	85.5	5.9	8.4	267000	8.08	1	217
38	70	1	2	2	1	2	1	1	1	2	1	1	1	0	0	1	1	1	1	1	1	1	1	1	1	1	1	1	0	0	0	13	6	0	1	448		1.76		13.9	4.86	8.4	78.7	11.3	9.7	268000	15.3	1	275
39	69	2	1	1	2	2	1	1	2	2	1	1	1	0	0	1	1	1	1	1	1	1	1	1	1	1	1	1	0	0	0	9	5	0	1	441		0.61		12.4	4.44	8.3	83.2	9.5	7	531000	1.45	1	301
40	73	1	1	1	1	1	1	1	1	2	1	1	1	0	0	1	1	1	1	1	1	1	1	1	1	1	1	1	0	1	8	17	10	1	2	317	75	1.07	65.23	12.5	4	6.2	81.6	9.1	8.5	144000	19.3	1	245
41	55	1	1	1	1	2	1	1	1	2	2	1	1	0	0	1	1	1	1	1	1	1	1	1	1	1	1	1	0	1	4	40	3	0	1	201		0.74		13.9	4.32	5.3	83.2	10.7	5.9	115000	5.44	1	270
42	73	2	1	2	1	1	1	1	2	1	1	1	1	0	0	1	1	1	1	1	1	1	1	1	1	1	1	1	0	1	5	5	3	0	1	128	121	1.03	92.92	10.6	4.14	2.3	68.5	22.4	8.8	169000	13.7	1	158
43	86	2	1	1			1	1	1	2	2	1	1	0	0	1	1	1	1	1	1	1	1	1	1	1	1	1	0	1	6	15	3	0	1	7486		0.63		11.4	3.89	7.3	85.3	9.1	5.2	522000	21.6	1	211
44	80	1	1	1	1	1	1	1	1	2	2	1	1	0	0	1	1	1	1	1	1	1	1	1	1	1	1	1	0	1	3	76	3	0	1	509		1.07		11.9	3.76	6.4	72.7	10.9	12.4	306000	15	1	260
45	56	1	1	1	1	2	2	1	1	1	1	1	1	0	0	1	1	1	1	1	1	1	1	1	1	1	1	1	0	0	0	13	5	0	1	263				12.2	4.72	8.1	77.4	12.3	9.3	284000	5.95	1	278
46	38	1	1	1	1	1	1	1	2	2	1	1	1	0	0	1	1	1	1	1	1	1	1	1	1	1	1	1	0	0	0	5	4	0	1	232		0.8		14.7	5.15	4.2	80.7	13.4	5.6	223000	16.4	1	302
47	48	1	1	1	1	2	1	1	1	2	1	1	1	0	0	1	1	1	1	1	1	1	1	1	1	1	1	1	0	1	5	9	2	0	1	171		0.89		13.1	4.36	12.4	78.6	14.8	6.5	457000	3.76	1	275
48	70	1	1	1	2	2	1	1	1	2	2	1	1	0	0	1	1	1	1	1	1	1	1	1	1	1	1	1	0	1	7	7	2	0	1	532		1.25		15.1	4.59	4.7	78.3	16.9	4.7	240000	6.77	1	375
49	62	1	1	1	1	1	1	1	1	2	1	1	1	0	0	1	1	1	1	1	1	1	1	1	1	1	1	1	0	0	0	15	7	1	1	11454		1.03		14.3	4.86	15.4	67.7	19.3	11.4	213000	6.97	1	164
50	80	2	1	1	2	2	1	2	1	2	1	1	1	0	0	1	1	1	1	1	1	1	1	1	1	1	1	1	0	0	0	8	1	0	1	251		0.43		12.6	4.36	3.3	58.2	29.2	11.4	136000	0.53	1	299
51	87	1	1	2	1	2	1	1	1	2	1	1	1	0	0	1	1	1	1	1	1	1	1	1	1	1	1	1	0	0	0	61	1	0	1	576				8.2	3.96	4.8	83.4	14.3	2	435000	1.26	1	370
52	58	1	1	1	1	2	1	1	1	2	1	1	1	0	0	1	1	1	1	1	1	1	1	1	1	1	1	1	0	1	5	14	1	0	1	404		0.9		13.7	4.6	10.9	86.4	6.1	7.5	581000	17.9	1	291
53	81	1	2	2	1	2	1	1	1	2	1	1	1	0	0	1	1	1	1	1	1	1	1	1	1	1	1	1	0	0	0	36	1	0	1	953		1.71		14.4	4.46	7.9	66.7	28.6	4	180000	7.41	1	103
54	65	2	1	1	1	2	2	1	2	2	1	1	1	0	0	1	1	1	1	1	1	1	1	1	1	1	1	1	0	0	0	11	9	0	1	350		0.44		12.7	4.12	10.3	82.5	8.1	9	370000	10.1	1	216
55	60	1	1	1	1	1	2	1	1	2	1	1	1	0	0	1	1	1	1	1	1	1	1	1	1	1	1	1	0	1	9	28	1	1	2	251		0.79		13.4	4.72	11.8	77.4	14	8.1	622000	11.6	1	206
56	70	2	1	1	1	2	1	1	1	2	1	1	1	0	0	1	1	1	1	1	1	1	1	1	1	1	1	1	0	0	0	9	1	0	1			0.77		12	3.82	6	79.5	16.3	3.9	179000	22.8	1	271
57	60	1	1	1			1	1	2	2	2	1	1	0	0	1	1	1	1	1	1	1	1	1	1	1	1	1	0	1	4	15	1	0	1	235		0.81		12.5	5.22	5	70.4	21.6	7.7	179000	6.8	1	349
58	53	2	1	1	1	2	1	1	2	2	1	1	1	0	0	1	1	1	1	1	1	1	1	1	1	1	1	1	0	0	0	10	1	0	1	687		0.88		12.9	4.29	11.7	90.7	3.9	5.4	267000	9.44	1	295
59	54	2	1	1	1	1	1	1	1	2	1	1	1	0	0	1	1	1	1	1	1	1	1	1	1	1	1	1	0	0	0	10	3	0	1	427		0.58		12.1	3.93	5.3	67.1	20.4	11.5	238000	7.4	1	290
60	97	2	2	1	1	2	1	1	1	1	1	1	1	0	0	1	1	1	1	1	1	1	1	1	1	1	1	1	0	0	0	8	3	0	1	602		2.1		11.7	4.05	8.8	76.1	16.8	6.4	303000	2.23	1	247
61	79	1	2	1	1	2	1	1	1	2	2	1	1	0	0	1	1	1	1	1	1	1	1	1	1	1	1	1	0	0	0	8	3	0	1	304	90			15.1	4.18	14.6	88.7	6.5	4.8	115000	15.1	1	335
62	67	1	1	1	1	1	1	1	1	2	1	1	1	0	0	1	1	1	1	1	1	1	1	1	1	1	1	1	0	0	0	7	3	0	1	224		0.99		14.3	4.65	5.3	70.6	19.2	10.1	182000	5.86	1	331
63	68	1	1	1	1	2	1	1	1	2	1	1	1	0	0	1	1	1	1	1	1	1	1	1	1	1	1	1	0	1	11	14	3	1	2	513		0.88		15.2	5.19	8.3	92.3	4.8	2.6	260000	12.6	1	281
64	91	2	1	1	1	2	1	1	1	1	1	1	1	0	0	1	1	1	1	1	1	1	1	1	1	1	1	1	0	0	0	5	1	0	1	285		1.07		13.2		4.2	70	18		200000	11	1	210
65	64	1	1	1	1	2	1	1	1	2	1	1	1	0	0	1	1	1	1	1	1	1	1	1	1	1	1	1	0	1	5	20	4	0	1	483		1.01		17.4	5.22	6.3	79.7	14.2	5.6	159000	5.33	1	229
66	74	1	1	1	1	1	1	1	1	2	1	1	1	0	0	1	1	1	1	1	1	1	1	1	1	1	1	1	0	0	0	25	4	0	1	606		1.03		15.9	5.06	7.4	78.8	17.5	3.4	132000	3.6	1	275
67	56	2	1	1	1	1	1	1	1	2	1	1	1	0	0	1	1	1	1	1	1	1	1	1	1	1	1	1	0	1	5	10	4	0	1	291		0.64		13.1	4.42	2.5	50.9	40.8	7.7	95000	3.64	1	281
68	63	1	2	1	2	2	1	1	2	2	1	1	1	0	0	1	1	1	1	1	1	1	1	1	1	1	1	1	0	0	0	7	5	0	1			3.66		8.9	3.42	2.6	90.3	7.3	2.2	229000	12.1	1	154
69	93	1	2	1	1	2	1	2	1	2	2	1	1	0	0	1	1	1	1	1	1	1	1	1	1	1	1	1	0	1	2	4	3	0	1			0.91		15.1	4.72	9.4	81.1	15.6	3	246000	20.5	1	164
70	88	2	1	1	1	2	1	1	1	2	2	1	1	0	0	1	1	1	1	1	1	1	1	1	1	1	1	1	0	1	5	42	7	1	2	24351		1.63		9.8	3.23	7.2	80.2	7.9	8.1	244000	12.6	1	200
71	57	1	1	1	1	2	1	1	2	2	1	1	1	0	0	1	1	1	1	1	1	1	1	1	1	1	1	1	0	0	0	12	5	0	1	235		0.86		13.6	4.88	6.1	64.1	22.1	13	218000	4.81	1	296
72	74	1	1	1	2	2	1	1	1	2	2	1	1	0	0	1	1	1	1	1	1	1	1	1	1	1	1	1	0	1	5	11	5	1	2	2838		1.5		11.9	5.61	4.4	82.8	10.8	5.9	118000	13.2	1	276
73	79	1	1	1	1	1	1	1	1	2	2	1	1	0	0	1	1	1	1	1	1	1	1	1	1	1	1	1	0	1	5	16	5	1	2	945		0.65		11	3.39	8.3	79.8	10.8	9.3	220000	9.89	1	224
74	81	1	2	1	2	2	1	1	1	1	1	1	1	0	0	1	1	1	1	1	1	1	1	1	1	1	1	1	0	0	0	7	5	0	1	664		1.15		11.9	3.78	6.1	70.5	21	8.2	191000	0.7	1	256
75	64	1	1	1			1	1	1	2	2	1	1	0	0	1	1	1	1	1	1	1	1	1	1	1	1	1	0	1	8	19	7	1	2	640		0.94		12.7	4.1	15.3	93.2	4	2.6	343000	23.1	1	51
76	72	1	2	1	2	1	1	1	1	2	2	1	1	0	0	1	1	1	1	1	1	1	1	1	1	1	1	1	0	1	8	20	11	0	1	3310		1.05		14	4.56	11.2	67.5	29.6	2.7	123000	3.3	1	197
77	56	1	1	1			1	1	1	2	2	1	1	0	0	1	1	1	1	1	1	1	1	1	1	1	1	1	0	1	8	15	7	0	1	1536		0.93		12.1	4.04	6.5	75.4	16.3	7.5	278000	9.9	1	526
78	81	2	2	1	1	2	1	1	1	2	1	1	1	0	0	1	1	1	1	1	1	1	1	1	1	1	1	1	0	0	0	25	5	0	1			0.6		10.9	3.9	16.5	86.2	10.2	3.5	431000	16.1	1	231
79	73	2	1	1	1	2	1	1	1	2	1	1	1	0	0	1	1	1	1	1	1	1	1	1	1	1	1	1	0	0	0	7	5	0	1	269		0.71		13.9	4.54	7.8	69.1	19.5	11.2	181000	1.39	1	263
80	72	1	1	1	1	2	1	1	1	2	2	1	1	0	0	1	1	1	1	1	1	1	1	1	1	1	1	1	0	1	5	27	12	1	2	519		1.78		14.8	4.86	10.9	90	6.5	3.3	184000	21	1	203
81	61	1	1	1	1	1	1	1	1	2	1	1	1	0	0	1	1	1	1	1	1	1	1	1	1	1	1	1	0	0	0	8	5	0	1	379		0.95		13.4	4.55	8	68.5	16.8	13.5	200000	10	1	310
82	68	2	2	2			1	1	2	2	2	1	1	0	0	1	1	1	1	1	1	1	1	1	1	1	1	1	0	1	7	15	9	0	1	432		0.79		11.1	3.61	9.8	70.9	13.2	15.1	313000	33.5	1	244
83	74	1	1		2	2	1	1	2	1	1	1	1	0	0	1	1	1	1	1	1	1	1	1	1	1	1	1	0	0	0	39	4	0	1	294		1.16		13.4	4.8	5.1	66.6	26.2	6.9	163000	5.18	1	290
84	61	1	1	1	1	1	1	1	2	2	1	1	1	0	0	1	1	1	1	1	1	1	1	1	1	1	1	1	0	0	0	14	7	0	1	2403				15.5		17.7	78	17		327000	22.3	1	276
85	66	1	1	1	1	1	1	1	1	1	1	1	1	0	0	1	1	1	1	1	1	1	1	1	1	1	1	1	0	0	0	14	8	0	1	1555		0.58		10.5	3.66	4.1	60.9	27.4	11.1	185000	1.67	1
86	83	1	1	1	1	2	1	1	1	2	2	1	1	0	0	1	1	1	1	1	1	1	1	1	1	1	1	1	0	1	10	42	7	1	2	2274				12.4	4.03	11.1	86.5	4.4	8.6	263000	10.6	1	252
87	55	1	1	1			1	1	1	2	2	1	1	0	0	1	1	1	1	1	1	1	1	1	1	1	1	1	0	1	8	23	10	0	1	265		0.8		12.4	3.92	8.2	80.8	8.5	10.4	344000	17.9	1
88	76	1	1	1	1	2	1	1	2	2	2	1	1	0	0	1	1	1	1	1	1	1	1	1	1	1	1	1	0	1	7	9	5	0	1	263		0.81		15.3	4.84	4.1	83.1	12.2	4.6	167000	2.64	1	310
89	60	1	1	1			1	1	2	2	2	1	1	0	0	1	1	1	1	1	1	1	1	1	1	1	1	1	0	1	10	15	7	0	1	4059		0.85		14.3	4.54	3.9	74.2	17.1	8.5	249000	11.2	1	280
90	75	1	1	1	1	2	1	1	1	1	1	1	1	0	0	1	1	1	1	1	1	1	1	1	1	1	1	1	0	1	5	5	4	1	2	14544		0.66		13.6	4.68	8.1	80.2	13.3	6.1	227000	13.9	1
91	87	1	1	1	1	1	1	2	1	2	1	1	1	0	0	1	1	1	1	1	1	1	1	1	1	1	1	1	0	0	0	10	7	0	1	2004		1.49		12.5	4.41	9.8	92	6.5	1.4	215000	11.7	1	519
92	64	2	1	1	1	1	1	1	1	2	1	1	1	0	0	1	1	1	1	1	1	1	1	1	1	1	1	1	0	0	0	14	6	0	1	381		0.52		11.7	3.76	7.9	75	19.4	5.3	168000	12.5	1	324
93	80	1	1	1	2	2	1	2	1	2	2	1	1	0	0	1	1	1	1	1	1	1	1	1	1	1	1	1	0	1	1	24	6	0	1	8270		1.29		12.3	4.2	9.1	88.8	3.5	7.1	319000	8.57	1	82
94	87	1	1	2	2	2	1	1	1	2	1	1	1	0	0	1	1	1	1	1	1	1	1	1	1	1	1	1	0	0	0	14	5	0	1			0.94		12.4	3.65	6.7	70.8	18.5	10.6	149000	9.64	1	243
95	61	2	1	1	1	1	1	1	1	2	1	1	1	0	0	1	1	1	1	1	1	1	1	1	1	1	1	1	0	0	0	10	5	0	1	986		0.58		15.1	4.73	5.1	57.6	33.2	8.2	147000	13.2	1	259
96	85	2	1	1	1	2	2	1	1	2	1	1	1	0	0	1	1	1	1	1	1	1	1	1	1	1	1	1	0	1	4	36	5	0	1	749		1.15		13	4.12	6.4	78	12.3	9.5	252000	6.15	1	228
97	85	1	2	1	1	1	1	1	1	2	2	1	2	0	0	1	1	1	1	1	1	1	1	1	1	1	1	1	0	1	2	10	4	1	2	1226		1.03		13.9	4.41	13.2	92	3.7	4.2	388000	20.8	1	367
98	48	1	1	1	1	2	1	1	1	1	1	1	1	0	0	1	1	1	1	1	1	1	1	1	1	1	1	1	0	0	0	7	4	0	1	265				14.7	5.04	7.6	79.4	9.8	10.6	278000	13.7	1	282
99	67	1	1	1			1	1	1	2	2	1	1	0	0	1	1	1	1	1	1	1	1	1	1	1	1	1	0	1	16	25	7	0	1			1.02		13	4.12	13.7	94.2	1.9	3	202000	23.7	1	344
100	67	1	1	1	1	1	1	1	1	2	2	1	1	0	0	1	1	1	1	1	1	1	1	1	1	1	1	1	0	1	5	11	7	0	1	357		0.66		12.7	4.2	5.9	74.3	13.5	11.1	278000	11.2	1	295
101	81	1	2	1	1	1	1	1	1	1	1	1	1	0	0	1	1	1	1	1	1	1	1	1	1	1	1	1	0	1	3	12	7	0	1	1034		1.21		11.3	4.56	7.1	86	8	5.8	247000	9.82	1	214
102	59	1	1	1	1	1	1	1	1	2	1	1	1	0	0	1	1	1	1	1	1	1	1	1	1	1	1	1	0	1	15	22	7	0	1	379		0.76		15	5.05	9.5	86.7	7.2	6	379000	9.85	1	249
103	77	2	1	1	1	2	1	2	1	2	1	1	1	0	0	1	1	1	1	1	1	1	1	1	1	1	1	1	0	0	0	5	3	0	1			1.39		14.3	4.32	6.9	84.9	6.8	8.2	138000	4.1	1	262
104	70	2	1	1	1	1	1	1	1	2	2	1	1	0	0	1	1	1	1	1	1	1	1	1	1	1	1	1	0	1	10	23	7	0	1	199		0.58		14.4	4.84	6.2	83.2	13	3.7	266000	4.15	1	294
105	83	1	1	2	2	2	1	1	1	2	1	1	1	0	0	1	1	1	1	1	1	1	1	1	1	1	1	1	0	1	2	9	5	0	1	271		2.12		12.9	4.69	5.8	61	29.4	8.8	105000	6.05	1	195
106	16	1	1	1	1	1	1	1	1	1	1	1	1	0	0	1	1	1	1	1	1	1	1	1	1	1	1	1	0	0	0	6	5	0	1	266		0.85		15.2	4.93	6.8	77	14.9	7.8	243000	5.21	1
107	78	1	2	1	2	2	1	1	1	1	1	1	1	0	0	1	1	1	1	1	1	1	1	1	1	1	1	1	0	0	0	7	5	0	1	370	70	1.82	33.12	12.3	3.84	6.8	73.7	14.3	10.6	311000	0.48	1	374
108	86	1	1	1	1	2	1	1	1	2	2	1	1	0	0	1	1	1	1	1	1	1	1	1	1	1	1	1	0	1	12	16	10	1	2	3216		1.44		12.2	3.94	4.2	77.7	13.6	8.6	123000	7.7	1	276
109	66	1	2	1	2	1	1	1	1	1	1	1	1	0	0	1	1	1	1	1	1	1	1	1	1	1	1	1	0	0	0	15	1	0	1			5.23		10.7	3.6	10.3	85.9	5.2	8.2	301000		1
110	65	1	1	1	1	1	1	1	1	2	1	1	1	0	0	1	1	1	1	1	1	1	1	1	1	1	1	1	0	1	8	30	7	1	1	3624		1.21		14.3	4.25	6.3	67.9	19.1	12.5	252000	8.46	1	288
111	83	2	1	1	1	2	1	1	1	2	2	1	1	0	0	1	1	1	1	1	1	1	1	1	1	1	1	1	0	1	8	22	7	0	1	6053		0.49		12.5	4.19	6	82.7	12.3	4.8	156000	8.46	1	375
112	51	1	1	1	1	1	1	1	1	2	1	1	1	0	0	1	1	1	1	1	1	1	1	1	1	1	1	1	0	0	0	14	9	1	1	5897	80	0.85	116.34	11.9	3.68	5.9	83.7	12.1	4	181000	1.5	1	352
113	73	1	2	1	1	2	1	1	1	2	1	1	1	0	0	1	1	1	1	1	1	1	1	1	1	1	1	1	0	1	6	7	5	0	1	6144		0.97		15.8	4.89	17.6	89.8	7.3	2.1	258000	14.6	1	148
114	78	1	2	1	2	1	1	1	1	1	1	1	1	0	0	1	1	1	1	1	1	1	1	1	1	1	1	1	0	0	0	10	5	0	1	272		0.7		11.5	4.01	6.6	74.2	15.8	9.8	216000	8.37	1	256
115	82	1	1	1	1	1	2	1	1	2	1	1	1	0	0	1	1	1	1	1	1	1	1	1	1	1	1	1	0	0	0	7	4	0	1	267		0.86		13.5	4.35	6.1	87.1	5.8	7	289000	10.6	1	249
116	67	1	1	1	2	1	1	1	2	2	2	1	1	0	0	1	1	1	1	1	1	1	1	1	1	1	1	1	0	1	15	28	4	0	1	8658		0.96		14.8	4.48	7.1	84.5	5.8	9.5	205000	7.33	1	192
117	75	2	1	1	1	2	1	1	1	2	2	1	1	0	0	1	1	1	1	1	1	1	1	1	1	1	1	1	0	0	0	23	4	0	1	4935		0.7		10.5	3.32	6.6	76.7	12.5	8	355000	12.7	1	190
118	86	2	1	1	1	2	1	2	1	1	1	1	1	0	0	1	1	1	1	1	1	1	1	1	1	1	1	1	0	0	0	25	12	0	1	2976		1.76		9.2	3.33	11.8	91.3	5.8	2.7	212000		1
119	45	2	1	1	1	1	1	1	1	2	1	1	1	0	0	1	1	1	1	1	1	1	1	1	1	1	1	1	0	0	0	6	5	0	1	167	57	0.76	84.11	13.8	4.63	5.1	55.4	28.4	15.2	165000	0.36	1	690
120	80	1	1	2	1	1	1	1	1	1	1	1	1	0	0	1	1	1	1	1	1	1	1	1	1	1	1	1	0	0	0	25	19	0	1	3852		0.55		12.2	3.64	3.9	45.5	37.2	16.8	134000	7.32	1	279
121	52	2	1	1	1	1	1	1	1	2	1	1	1	0	0	1	1	1	1	1	1	1	1	1	1	1	1	1	0	1	9	20	5	0	1			0.64		13.8	4.48	5	84.2	10.7	5	283000	8.39	1	314
122	50	1	1	1	2	1	1	1	1	2	1	1	1	0	0	1	1	1	1	1	1	1	1	1	1	1	1	1	0	0	0	5	2	0	1	256	95	0.76	156.25	14.1	4.66	4.2	75	18.8	6	197000	7.46	1	257
123	74	2	1	1	1	2	1	1	1	2	1	1	1	0	0	1	1	1	1	1	1	1	1	1	1	1	1	1	0	0	0	7	2	0	1	960		0.64		12.5	4.06	4	47.6	34.4	15.2	207000	1.44	1	306
124	57	1	1	1	1	2	1	1	1	1	1	1	1	0	0	1	1	1	1	1	1	1	1	1	1	1	1	1	0	0	0	10	2	0	1	200				16.3	5.3	12.3	86.4	5.8	7.7	263000	1.01	1	300
125	52	1	1	1			1	1	1	2	2	1	1	0	0	1	1	1	1	1	1	1	1	1	1	1	1	1	0	1	10	18	6	0	1	978		1.03		14.5	4.8	7.3	71.7	16.1	11.6	216000	4.4	1
126	52	1	1	1			1	1	1	2	2	1	1	0	0	1	1	1	1	1	1	1	1	1	1	1	1	1	0	1	4	8	4	0	1	235		1.23		13.4	4.59	13.4	90.8	5.9	2.5	182000	14.2	1	210
127	54	1	1	1			1	1	1	2	2	1	1	0	0	1	1	1	1	1	1	1	1	1	1	1	1	1	0	1	7	13	4	0	1	235		1.01		11.7	4.42	11	80.3	8.5	10	311000	15.3	1	236
128	74	1	1	1	1	2	1	1	1	2	2	1	1	0	0	1	1	1	1	1	1	1	1	1	1	1	1	1	0	1	6	42	5	0	1					13.3	4.14	6.1	74.1	13.3	12.5	181000	9.8	1	268
129	67	1	1	1	1	2	1	1	1	1	1	1	2	0	0	1	1	1	1	1	1	1	1	1	1	1	1	1	0	0	0	22	18	0	1	2964	76	1.12	68.8	13.2	4.78	4.6	51.1	30.2	17.4	106000	5.15	1
130	45	1	1	1	1	1	1	1	1	2	1	1	1	0	0	1	1	1	1	1	1	1	1	1	1	1	1	1	0	1	8	14	7	0	1	684		1.06		13.4	4.87	8.7	79.7	15.3	4.9	183000	7.09	1	333
131	74	2	1	1			1	1	1	2	2	1	1	0	0	1	1	1	1	1	1	1	1	1	1	1	1	1	0	1	13	7	8	0	1	4993		0.58		12.7	4.21	7.1	80	12	7.7	295000	4.5	1	333
132	59	1	1	1	2	2	1	1	1	2	2	1	1	0	0	1	1	1	1	1	1	1	1	1	1	1	1	1	0	1	3	3	2	0	1	917	80	0.97	92.78	16	5.61	17.5	89.4	4.8	5.2	295000	15.04	1	171
133	71	1	2	1	1	2	1	1	1	2	1	1	1	0	0	1	1	1	1	1	1	1	1	1	1	1	1	1	0	0	0	8	3	0	1	302		0.77		11.9	3.71	3.6	70.9	19	10	110000	7.78	1	313
134	92	1	1	1	1	2	1	1	1	2	1	1	1	0	0	1	1	1	1	1	1	1	1	1	1	1	1	1	0	0	0	51	9	0	1	17257		1.18		12	4.08	10.1	86.1	7.9	5.8	406000	14	1	277
135	54	2	1	1	1	1	1	1	1	2	1	1	2	0	0	1	1	1	1	1	1	1	1	1	1	1	1	1	0	0	0	12	5	0	1			0.88		11.5	3.68	2.3	32.3	60.6	6.7	120000	0.29	1	387
136	70	1	1	1	1	2	1	1	2	2	1	1	1	0	0	1	1	1	1	1	1	1	1	1	1	1	1	1	0	1	12	25	7	1	2	10728		0.8		13.2	4.11	7.3	72.7	16.2	8.5	162000	12.12	1
137	68	1	1	1	1	1	1	1	1	2	1	1	1	0	0	1	1	1	1	1	1	1	1	1	1	1	1	1	0	0	0	7	6	0	1	612	70	0.56	125	13.8	4.39	9.8	77.6	14.8	7.3	433000	4.87	1	260
138	47	1	1	1	2	1	1	1	1	2	1	1	1	0	0	1	1	1	1	1	1	1	1	1	1	1	1	1	0	0	0	9	7	0	1	126		0.89		14.4	4.51	6	54.4	28.2	13.5	473000	9.68	1	319
139	76	2	1	1	1	2	1	1	1	2	1	1	1	0	0	1	1	1	1	1	1	1	1	1	1	1	1	1	0	0	0	32	7	0	1	620		0.47		11.6	3.85	6.1	90.8	5.9	3.2	388000	22.4	1	269
140	71	2	1	1	1	1	1	1	1	1	1	1	1	0	0	1	1	1	1	1	1	1	1	1	1	1	1	1	0	1	13	33	8	1	2	2347		0.44		11.4	3.76	5.6	87.3	6.9	5.5	417000	8.96	1	259
141	53	1	1	1	1	2	1	1	2	2	1	1	1	0	0	1	1	1	1	1	1	1	1	1	1	1	1	1	0	0	0	12	5	0	1	430		0.95		17	5.3	4.5	61.4	24.1	14.2	183000	1.38	1	246
142	71	2	2	1	2	2	1	1	1	2	1	1	1	0	0	1	1	1	1	1	1	1	1	1	1	1	1	1	0	0	0	14	9	0	1	336		0.93		14.4	4.86	5.9	70.9	20.1	8.7	131000	2.26	1	296
143	83	1	1	1	1	2	1	1	1	2	1	1	1	0	0	1	1	1	1	1	1	1	1	1	1	1	1	1	0	0	0	27	6	0	1	520		0.8		12	3.96	10.5	83.4	12.3	3.9	289000	11.3	1	239
317	70	2	1	1	1	2	1	1	1	2	2	2	1	1	0	1	2	1	1	1	1	1	1	2	1	1	1	1	0	1	2	2	1	1	2	11385		0.81		13.1	4.36	6	75.9	17.2	6.3	222000	13.41	2	227
319	62	1	1	1	1	2	1	1	1	2	2	2	1	0	1	1	1	1	1	1	1	2	1	1	1	1	2	1	1	1	11	43	2	1	1	39217		1.62		15.5	5.33	28.1	64.6	6	28.8	259000	19.14	2	156
323	89	2	1	1	2	2	1	2	1	1	1	1	1	0	1	1	1	1	1	1	1	2	1	1	1	1	2	1	1	1	14	24	17	1	1	344		1.91		11.2	3.9	4.9	74.9	11.5	12.6	193000	2.16	2	336
324	77	1	1	1	1	1	1	2	1	2	1	1	1	0	0	1	1	1	1	1	1	1	1	1	1	1	1	1	0	0	0	10	7	1	1	665		0.96		12.3	3.76	3.5	53.2	23.6	23	118000	0.29	1
325	81	1	2	1	1	2	2	1	1	2	2	1	1	0	0	1	1	1	1	1	1	1	1	1	1	1	1	1	0	1	6	8	7	0	1	430		1.64		13.9	4.42	11.9	90.9	5.3	3.5	173000	4.17	1	77
326	87	1	2	2	2	2	1	2	1	2	2	1	1	0	0	1	1	1	1	1	1	1	1	1	1	1	1	1	0	0	0	8	7	0	1	547		1.19		13.4	4.27	14.3	93.6	1.5	4.8	164000	6.03	1	172
327	56	1	1	1	1	1	1	1	1	1	1	1	1	0	0	1	1	1	1	1	1	1	1	1	1	1	1	1	0	0	0	11	8	0	1	413		1.7		15.5	5.17	10.1	79.8	11.1	8.6	198000	7.2	1	313
328	61	1	1	1	2	2	1	1	1	2	2	1	1	0	0	1	1	1	1	1	1	1	1	1	1	1	1	1	0	1	2	5	4	1	1	251		0.74		14.1	4.23	7.2	80.4	14.5	4.7	285000	15.46	1	225
329	39	2	1	1	1	1	1	1	1	1	1	1	1	0	0	1	1	1	1	1	1	1	1	1	1	1	1	1	0	0	0	7	7	0	1			0.96		14.6	4.64	2	56.5	27.6	15.3	110000	0.39	1	381
330	80	1	1	1	2	2	1	1	1	1	1	1	1	0	0	1	1	1	1	1	1	1	1	1	1	1	1	1	0	0	0	7	6	0	1	503		1.25		11.2	3.68	10.1	70.4	24.4	5	194000	5.6	1
331	82	1	1	2	1	2	1	2	1	2	1	1	1	0	0	1	1	1	1	1	1	1	1	1	1	1	1	1	0	0	0	14	8	0	1			1.54		13.7	4.52	4	87.1	16.4	5.4	116000	10.03	1	55
332	56	1	1	1	1	1	1	1	1	2	1	1	1	0	0	1	1	1	1	1	1	1	1	1	1	1	1	1	0	0	0	8	7	0	1	227		0.92		14.8	5.04	12.5	90.4	4.5	4.4	234000	10.06	1	300
333	55	2	1	1	1	1	1	1	1	2	2	1	1	0	0	1	1	1	1	1	1	1	1	1	1	1	1	1	0	1	11	19	14	0	1	208		0.84		14.4	4.66	11.4	68.7	22.7	8.5	179000	5.22	1	238
334	54	1	1	1	1	2	1	1	1	2	2	1	1	0	0	1	1	1	1	1	1	1	1	1	1	1	1	1	0	1	11	19	15	0	1	114		0.78		14.5	4.89	9.3	87.2	5.5	7.1	201000	6.27	1	303
335	69	1	1	1	1	1	1	1	1	2	1	1	1	0	0	1	1	1	1	1	1	1	1	1	1	1	1	1	0	0	0	11	8	0	1	528		0.89		15.4	5.21	8.2	77.2	15.7	6.6	229000	11.25	1	315
336	49	1	1	1	1	1	1	1	1	2	1	1	1	0	0	1	1	1	1	1	1	1	1	1	1	1	1	1	0	0	0	5	4	0	1	148		0.94		14.8	4.94	4.4	68.3	20.9	10	155000	1.77	1	292
337	85	1	1	1	2	2	1	1	1	1	1	1	1	0	0	1	1	1	1	1	1	1	1	1	1	1	1	1	0	0	0	12	8	0	1	646		1.3		12.3	3.67	8.6	74.4	15	10.3	290000	2.4	1	308
338	85	1	2	1	2	1	1	2	1	1	1	1	1	0	0	1	1	1	1	1	1	1	1	1	1	1	1	1	0	0	0	16	10	1	1	1073		1.01		11.1	5.31	4.2	69.7	19.6	10.4	120000	2.08	1	276
339	82	1	2	1	1	2	1	1	1	2	2	2	1	1	1	1	1	1	1	2	1	1	1	1	2	1	1	2	1	1	10	10	7	1	1	1176		2.43		9.8	3.05	8.2	77.1	8.8	13.2	400000	8.56	2	95
343	79	1	2	2	1	1	2	1	1	2	2	1	1	0	0	1	1	1	1	1	1	1	1	1	1	1	1	1	0	1	15	18	10	0	1	221		0.96		15.1	5.15	7.6	82.3	7.5	9.7	135000	3.21	1	275
347	87	1	1	1	1	1	1	1	1	2	2	1	1	1	1	2	1	1	1	2	1	1	2	1	1	1	1	1	0	1	4	30	6	1	1	6065		1.6		13.5	4.46	12.6	89.3	4.4	5.7	330000	16.07	2	239
348	86	1	2	1	1	1	1	1	1	2	2	1	1	1	1	1	1	1	1	2	1	1	1	1	2	1	1	1	0	1	20	45	7	1	2	10600		0.71		14.9	3.96	7.4	92.2	3.9	3.6	300000	12.72	2	164
349	59	1	1	1	1	2	1	1	1	1	2	1	1	0	1	1	1	2	1	1	1	1	1	1	1	1	1	1	0	1	11	50	11	0	1	281		0.91		12.5	4.13	11.8	86	6.3	7.6	290000	4.88	2	98
350	87	1	1	2	1	1	1	1	1	2	1	1	1	0	1	1	1	2	1	1	1	1	1	1	1	1	1	1	0	1	12	50	13	0	1	11261		0.96		13	3.94	3.4	82.4	7.4	10.1	92000	4.46	2	92
351	70	1	1	1	1	2	1	1	1	1	1	1	1	0	0	1	1	1	1	1	1	1	1	1	1	1	1	1	0	0	0	15	4	0	1	21754		0.75		15.8	4.67	4.5	77.8	13.4	8.7	94000	5.15	1	252
353	87	1	1	1	1	2	1	1	1	1	1	1	1	0	0	1	1	1	1	1	1	1	1	1	1	1	1	1	0	1	5	38	7	1	2	450		1		12.9	4.25	7.7	80.6	12.2	6.9	198000	8.19	1	200
354	73	2	1	1	2	2	1	1	1	1	1	1	1	0	0	1	1	1	1	1	1	1	1	1	1	1	1	1	0	0	0	21	14	0	1	259		4.29		11.9	3.82	10.2	76.6	10.4	13.3	683000	10.83	1	285
355	84	1	1	1	1	2	1	1	1	2	2	1	1	0	0	1	1	1	1	1	1	1	1	1	1	1	1	1	0	1	15	31	9	0	1	3308		0.92		12.9	4.02	11.7	86.8	3.2	9.7	203000	14.09	1	319
356	73	2	1	1	2	1	1	1	1	2	2		1	0	0	1	1	1	1	1	1	1	1	1	1	1	1	1	0	1	12	28	12	0	1	265		0.79		12.8	4.17	8.1	73.7	15.7	10.4	201000	1.9	1	197
357	52	1	1	1	1	1	1	1	1	1		1	1	0	0	1	1	1	1	1	1	1	1	1	1	1	1	1	0	1	13	21	14	0	1	235		1.01		16.6	5.19	5.2	89.4	7.4	3.1	246000	2.34	1	269
358	50	1	1	1	1	2	1	1	2	2	2	2	1	0	0	1	1	1	1	1	1	1	1	1	1	1	1	1	0	1	7	14	15	0	1	274		0.98		14.8	5.4	5.5	69	19.2	11.4	133000	1.18	1	209
359	71	2	1	1	2	2	1	1	2	2	2	2	1	1	1	2	1	1	1	2	1	2	2	1	1	1	1	1	0	1	14	43	10	0	1	952		0.85		9.1	4.1	7.9	88	8.5	3	309000	20.59	2	229
360	84	2	2	2	2	2	1	2	1	2	2	1	1	0	0	1	1	1	1	1	1	1	1	1	1	1	1	1	0	1	5	8	3	0	1	925		1.84		13	5.05	10.9	88	9.9	1.9	202000	23.39	1	226
361	51	2	1	2	1	2	1	1	1	2	2	1	1	0	0	1	1	1	1	1	1	1	1	1	1	1	1	1	0	1	16	25	12	0	1	999		0.59		13	4.86	8.6	82.3	8.4	9.2	209000	5.56	1	208
362	70	2	1	1	2	1	1	1	2	2	2	2	1	0	0	1	1	1	1	1	1	1	1	1	1	1	1	1	0	1	9	17	12	0	1	188		1.07		12.4	4.67	5.7	71.6	15.7	10	118000	4.3	1	261
363	63	2	1	1	1	2	1	1	1	2	2	1	1	0	0	1	1	1	1	1	1	1	1	1	1	1	1	1	0	1	19	27	6	0	1	243		0.56		12.8	3.96	8.3	82	10	7.8	218000	9	1	255
364	79	1	1	1	1	1	1	1	1	2	2	2	1	0	1	1	1	2	1	1	1	1	1	1	1	1	1	1	0	1	18	40	30	0	1			1.05		16.2	5.24	6.1	83.4	10.8	5.1	117000	13.78	2	235
365	72	1	1	2	1	2	1	1	1	2	2	1	1	0	0	1	1	1	1	1	1	1	1	1	1	1	1	1	0	1	20	30	2	0	1	45325		1.18		13.5	4.39	7.1	88.3	6.6	5.1	397000	6.45	1	187
366	69	1	1	1	1	1	1	1	1	2	2	1	1	0	0	1	1	1	1	1	1	1	1	1	1	1	1	1	0	1	17	36	12	0	1	219		1.24		15	4.32	3.8	72	13.5	14.2	105000	7.15	1	147
367	80	1	2	1	1	2	1	1	1	2	1	1	1	0	0	1	1	1	1	1	1	1	1	1	1	1	1	1	0	1	9	19	2	0	1	206		1.09		14.7	4.47	5.5	68.7	20.2	10.5	155000	14.79	1	252
368	77	1	1	1	2	1	1	1	2	2	2	2	1	1	1	2	1	1	1	1	1	2	2	1	1	1	1	1	0	1	21	40	12	0	1	453		0.83		13.8	4.15	10.2	93.4	5	1.5	262000	13.13	2	105
369	72	2	1	1	1	2	1	1	2	2	2	2	1	0	0	1	1	1	1	1	1	1	1	1	1	1	1	1	0	1	15	22	3	0	1	335		0.6		13.7	5	10	81.9	12.3	5.1	255000	5.42	1	194
370	60	2	1	1	1	2	1	1	1	2	2	1	1	0	0	1	1	1	1	1	1	1	1	1	1	1	1	1	0	1	9	13	3	0	1	791		0.64		12.6	4.06	8.3	85.4	7.8	6.3	198000	16.9	1	202
371	60	2	1	1	2	2	1	1	1	2	2	1	1	0	0	1	1	1	1	1	1	1	1	1	1	1	1	1	0	1	8	17	1	0	1	322		0.85		14.7	4.69	11	82.1	12.1	5.2	258000	6.93	1	210
372	77	1	1	1	1	2	1	1	2	2	2	1	1	0	0	1	1	1	1	1	1	1	1	1	1	1	1	1	0	1	13	27	3	0	1	1219		1.09		11.2	3.62	5.2	90.1	6	3.7	165000	3.37	1	303
373	65	2	1	1	1	2	1	1	2	2	2	2	1	1	0	2	1	1	1	1	1	1	1	1	1	1	1	1	0	1	9	9	5	1	2	9815		0.67		14.1	4.75	14.9	86.4	7.8	5.7	363000	13.23	2	247
374	69	1	1	1	1	2	1	1	1	2	2	1	1	0	1	1	1	1	1	2	1	1	1	1	1	1	1	1	0	1	27	33	20	1	2	12000		0.97		14.8	5.01	14.5	93.3	2.7	3.8	213000	10	2	161
375	90	2	1	1	1	2	1	1	1	2	1	1	1	0	0	1	1	1	1	1	1	1	1	1	1	1	1	1	0	1	11	38	24	0	1	1982		0.66		10.8	3.77	8.7	87.9	8.1	3.2	397000	15	1	299
376	70	1	1	1	1	2	1	1	1	2	1	2	2	0	0	1	1	1	1	1	1	1	1	1	1	1	1	1	0	1	8	13	5	0	1	355		0.52		12.7	3.83	5.5	75.5	10	14.3	113000	2.11	1	203
377	79	1	1	1	1	1	1	1	1	1	2	1	1	0	0	1	1	1	1	1	1	1	1	1	1	1	1	1	0	1	22	39	15	0	1	6848		0.95		12.2	4.19	7.4	85.2	6.3	7.9	190000		1	187
378	75	1	2	1	2	2	1	1	1	1	1	1	1	0	0	1	1	1	1	1	1	1	1	1	1	1	1	1	0	1	21	29	2	0	1	313		0.83		12.5	3.94	4.3	51.6	34.8	12	198000	9.69	1	270
379	82	1	1	1	1	2	1	1	1	1	2	2	1	0	0	1	1	1	1	1	1	1	1	1	1	1	1	1	0	1	25	37	8	0	1	1787		0.81		15.2	5.07	9	84.2	8.2	6.8	471000	15.5	1	178
380	78	1												0	0	1	1	1	1	1	1	1	1	1	1	1	1	1	0	0	0	5	1	0	1			0.99		15	4.93	8.4	83.8	5.3	10.2	358000	2	1	330
381	74	1	1	2	1	1	1	1	1	2	2	1	1	0	0	1	1	1	1	1	1	1	1	1	1	1	1	1	0	1	9	29	2	0	1	356		1.02		16.9	5.38	9.4	82.8	11.3	5.8	191000	8.71	1	135
382	55	1	1	1	1	1	1	1	1	2	1	1	1	1	1	2	1	1	1	2	1	1	2	1	1	1	1	1	0	1	12	23	2	0	1	662		1.05		16.9	5.14	12.6	95.5	2.6	1.9	164000	21.22	2	113
383	66	1	2	2	1	1	1	1	1	2	1	1	1	0	0	1	1	1	1	1	1	1	1	1	1	1	1	1	0	1	10	32	17	0	1	223		1.56		14.9	4.73	4.6	71.9	24.5	3.3	90000	1.6	1	228
384	64	1	1	1	2	1	1	1	2	2	2	2	1	0	0	1	1	1	1	1	1	1	1	1	1	1	1	1	0	1	14	36	13	0	1	1050		1.12		14.3	4.66	6.9	83.3	11.4	5.2	367000	8.87	1	71
385	57	1	1	1	1	2	1	1	2			2	1	0	0	1	1	1	1	1	1	1	1	1	1	1	1	1	0	1	8	19	5	0	1	337		1.2		14.9	4.9	4.9	62.9	26.5	9.7	161000	253	1	279
386	78	1	1	1	1	1	1	1	1	2	1	1	1	0	0	1	1	1	1	1	1	1	1	1	1	1	1	1	0	1	27	33	12	0	1	382		0.92		12.1	3.74	12	92	4.4	3.4	211000	27.23	1	178
387	72	1	1	1	1	2	1	1	1	2	2	1	1	0	0	1	1	1	1	1	1	1	1	1	1	1	1	1	0	1	13	30	9	0	1	250		1.22		14.3	4.55	9.6	83.9	9.9	5.8	171000	21.13	1	248
388	62	1	1	2	1	1	1	1	1	2	2	1	1	0	0	1	1	1	1	1	1	1	1	1	1	1	1	1	0	1	9	21	10	0	1													1
389	71	2	2	2	1	1	1	1	1	2	2	1	1	0	0	1	1	1	1	1	1	1	1	1	1	1	1	1	0	1	3	44	23	0	1	305		1.51		11.2	3.69	3.4	80.2	14.8	4.6	174000	6	1	71
390	73	1	1	1	1	1	1	1	1	2	2	1	1	0	0	1	1	1	1	1	1	1	1	1	1	1	1	1	0	1	9	16	1	0	1	386		0.87		13.4	6.36	7.6	88.4	6.5	5	276000	8.36	1	317
391	49	1	1	1	1	1	1	1	1	2	2	1	1	0	0	1	1	1	1	1	1	1	1	1	1	1	1	1	0	1	8	14	2	0	1	290		0.76		14.8	4.91	7.7	79.9	13.8	6.1	222000	12.43	1	318
392	84	1	1	1	1	2	1	1	1	2	1	1	1	0	0	1	1	1	1	1	1	1	1	1	1	1	1	1	0	1	13	32	11	1	2	3308		0.92		12.9	4.02	11.7	86.8	3.2	9.7	203000	14.09	1	319
393	81	1	1	1	1	2	1	1	1	2	2	1	1	0	0	1	1	1	1	1	1	1	1	1	1	1	1	1	0	1	28	39	20	0	1	430		1.09		16.3	5.2	13.5	88.1	6.5	5.1	306000	2.88	1	192
394	63	1	1	2	1	1	1	1	1	2	1	1	1	0	0	1	1	1	1	1	1	1	1	1	1	1	1	1	0	1	6	14	10	0	1			0.93		16.1	4.97	3.9	72.5	16	10.9	115000	4.82	1	305
395	76	1	1	1	1	1	1	1	1	2	2	1	1	0	0	1	1	1	1	1	1	1	1	1	1	1	1	1	0	1	14	25	4	0	1	397		1.75		14.6	4.43	6.9	67.1	23.7	6.6	110000	8.7	1	291
396	73	2	1	1	1	2	1	1	2	2	2	1	1	0	0	1	1	1	1	1	1	1	1	1	1	1	1	1	0	1	17	22	4	1	1	5790		0.83		12.4	4.08	11.4	89.7	6.8	3.4	332000	11.55	1	177
397	76	1	1	1	1	1	1	1	1	2	2	1	1	1	1	2	1	2	1	1	1	1	1	1	1	1	2	1	1	1	19	19	15	1	2	3308		1.1		14.7	4.99	20.2	97.8	1.5	0.6	454000	10.6	2	215
398	48	1	1	1	1	1	1	1	1	2	2	2	2	0	0	1	1	1	1	1	1	1	1	1	1	1	1	1	0	1	7	18	6	0	1	257		0.7		12.1	4.38	80.8	21.8	74.2	2.8	275000	2.45	1	303
399	76	2	1	1	2	1	1	1	1	2	2	1	1	0	0	1	1	1	1	1	1	1	1	1	1	1	1	1	0	1	11	33	4	0	1	715		0.82		15	4.84	9.8	83.3	9.2	3.9	220000	6.31	1	232
400	77	1	2	1	1	2	1	1	2	2	1	1	1	0	0	1	1	1	1	1	1	1	1	1	1	1	1	1	0	1	18	21	15	0	1			0.93		12.8	4.23	9.5	81.8	10.6	6.2	484000	2.48	1	243
401	69	1	1	1	1	2	1	1	1	2	1	1	1	0	0	1	1	1	1	1	1	1	1	1	1	1	1	1	0	1	14	30	10	0	1	159		1.09		14.6	4.97	6.6	86	5.1	8.9	143000	7.12	1	277
402	69	1	1	1	1	2	1	1	1	2	2	1	1	0	0	1	1	1	1	1	1	1	1	1	1	1	1	1	0	1	13	22	6	0	1	206		1.11		14.1	4.41	4.5	75.6	14.9	9.4	136000	8.62	1	289
403	81	2	1	1	2	2	1	1	1	2	1	1	1	0	1	1	1	1	1	2	1	1	1	1	1	1	1	1	0	1	9	18	2	1	2			1.2		11.6	4.02	7.1	82.3	9.1	8.3	274000	8.21	2	217
414	74	2	1	1	1	1	1	1	1	1	1	1	1	0	1	1	1	1	1	2	1	1	1	1	1	1	2	1	1	0	0	22	11	0	1	153		0.87		13.6	4.86	2.4	77	15.2	7.6	120000	5.5	2	291
416	66	1	1	1	2	1	1	1	1	2	2	1	1	0	0	1	1	1	1	1	1	1	1	1	1	1	1	1	0	0	0	42	14	0	1	97		0.7		13.7	4.56	3.2	50.6	41.4	7.7	104000	5.24	1	136
417	40	2	1	1	1	2	1	2	1	2	2	1	1	0	0	1	1	1	1	1	1	1	1	1	1	1	1	1	0	1	5	5	5	0	1	375		1.2		13	4.6	5.7	82	12.4	5.2	118000	11.34	1	58
418	93	2	1	1	1	1	2	2	2	1	1	1	1	0	0	1	1	1	1	1	1	1	1	1	1	1	1	1	0	0	0	43		0	1	995		0.68		14	3.54	9.5	74.1	21.2	4.2	190000	12.56	1	203
419	85	1	2	2	2	1	1	2	1	1	1	1	1	0	0	1	1	1	1	1	1	1	1	1	1	1	1	1	0	0	0	30	7	1	1	604		1.27		13	4.36	7.9	61.5	22.6	14.2	145000	1.82	1
420	61	2	1	1	1	1	1	1	1	1	1	1	1	0	0	1	1	1	1	1	1	1	1	1	1	1	1	1	0	0	0	8	7	0	1			0.69		5.7	2.49	7.2	83.7	8.2	6.9	373000	0.39	1	311
421	65	2	1	1	1	2	1	1	1	1	1	1	1	0	0	1	1	1	1	1	1	1	1	1	1	1	1	1	0	0	0	5	2	0	1	165		0.67		14.7	4.8	11	84.5	7.7	7.6	243000	0.12	1
422	61	1	1	2	2	2	1	1	1	2	2	1	1	0	0	1	1	1	1	1	1	1	1	1	1	1	1	1	0	1	17	23	10	0	1			1.1		14.8	4.4	10.1	87.7	7.4	4.8	219000	25.74	1	222
423	80	1	1	1	1	2	1	1	1	2	2	1	1	0	0	1	1	1	1	1	1	1	1	1	1	1	1	1	0	1	11	21	8	0	1	1185		0.99		12.8	4.06	2.9	77.5	17.1	5.1	143000	11.33	1	204
424	81	1	1	2	1	1	1	1	1	2	2	1	1	0	0	1	1	1	1	1	1	1	1	1	1	1	1	1	0	1	5	7	6	1	2	452		1.03		14	4.54	7.6	90.4	4.9	4.6	187000	10.02	1	218
425	71	1	1	1	1	1	1	1	1	1	1	2	2	0	0	1	1	1	1	1	1	1	1	1	1	1	1	1	0	0	0	11	7	1	1	28619		1.29		14.6	4.5	11.6	72.4	12.3	13.5	196000	9.06	1	291
426	85	1	1	1	1	1	1	2	1	2	1	1	1	0	0	1	1	1	1	1	1	1	1	1	1	1	1	1	0	0	0	7	5	0	1	608		1.5		11	3.71	6.1	93.1	5.6	1.1	134000	20.49	1	62
427	94	1	1	1	1	2	1	2	1	2	1	1	1	0	0	1	1	1	1	1	1	1	1	1	1	1	1	1	0	0	0	15	8	0	1	184		1.16		14.3	4.62	6.9	76.6	9.7	10.1	176000	0.27	1	282
429	68	2	1	1	1	2	1	1	1	2	2	1	1	0	0	1	1	1	1	1	1	1	1	1	1	1	1	1	0	1	8	25	7	0	1	235		0.84		16.2	5.57	4.5	69.5	18.2	12.1	157000	0.86	1	208
437	72	1	1	1	1	1	1	1	1	2	2	1	1	0	0	1	1	1	1	1	1	1	1	1	1	1	1	1	0	1	4	4	4	1	1	5549		1.52		12	4.77	12.1	89.4	6	4.5	304000	53.11	1	170
439	78	1	1	1	1	1	1	1	1	2	2	1	1	1	0	2	1	1	1	1	1	1	1	1	1	1	1	1	0	1	14	14	12	1	2	2986		0.6		12.3	3.76	26	92.7	2.8	3.7	233000	28.5	2	110
440	78	1	1	1	2	2	1	1	1	2	1	1	1	0	1	1	1	1	1	1	1	2	1	1	1	1	1	1	0	0	0	25	20	1	1	787		6.24		10.8	3.19	4.4	74.5	14	11.2	145000	8.09	2	219
444	76	1	1	2	1	2	1	1	1	2	2	1	1	1	0	2	1	1	1	1	1	1	1	1	1	1	1	1	0	1	5	7	6	1	2	937		1.2		14.9	5.1	10.2	80.9	10.9	8	231000	8.82	2	219
449	85	1	1	1	1	2	1	2	1	2	1	1	1	1	1	1	2	1	2	1	1	1	1	1	1	1	1	1	0	1	2	2	2	1	1	1199		3.17		14.1	4.39	15.3	76.9	16.4	6.1	186000	19	2	306
450	75	2	2	1	1	2	1	1	1	1	1	1	1	0	0	1	1	1	1	1	1	1	1	1	1	1	1	1	0	0	0	10	7	0	1	488		0.7		12	3.68	9.1	80.8	14.2	4.7	187000	7.51	1	236
453	71	1	1	1	1	1	1	1	1	2	2	2	1	1	0	1	2	1	1	1	1	1	1	2	1	1	1	1	0	1	24	27	11	1	1	4043		1.03		16.6	5.45	15.1	90.5	5.3	3.8	322000	18.86	2	57
454	71	2	1	1	1	2	1	1	1	2	2	1	1	0	1	1	1	1	1	1	2	1	1	1	1	1	1	1	0	1	16	22	15	1	2	575		0.73		12.4	3.99	9.1	82.1	10.6	7	199000	1.32	2	141
455	61	1	1	1	1	2	1	1	1	2	2	2	1	1	0	2	1	1	1	1	1	1	2	1	1	1	1	1	0	1	19	28	10	1	1	25506		1		13.5	4.3	8.8	85.4	7.4	5.8	399000	17.69	2	137
456	84	2	1	1	1	2	1	1	1	1	1	1	1	1	1	2	1	2	1	2	1	2	1	1	1	1	2	1	1	1	8	8	7	1	1	1063		1.45		16.7	5.17	6.5	90.2	5.9	3.8	222000	10.78	2	297
459	80	1	1	1	1	1	1	2	1	2	2	2	1	1	1	1	2	1	1	2	1	1	1	2	1	1	1	1	0	1	19	40	15	1	2	35681		1.51		15.1	4.8	6.9	91.1	4.9	3.8	180000	8.4	2	393
461	90	2	1	1	2	2	1	2	1	1	1	1	1	0	0	1	1	1	1	1	1	1	1	1	1	1	1	1	0	0	0	11	7	0	1	195		0.52		11.8	3.88	6.4	67.6	20.7	10.3	167000	6.44	1	280
465	75	2	1	1	1	2	1	1	2	2	2	1	1	0	0	1	1	1	1	1	1	1	1	1	1	1	1	1	0	1	19	31	15	0	1	297		0.62		10.4	4.92	8	76.9	16.8	6	222000	4.47	1	144
466	75	1	1	1	2	2	2	2	1	2	2	1	1	0	0	1	1	1	1	1	1	1	1	1	1	1	1	1	0	1	5	7	6	0	1	259		1.28		13.6	5.91	7.2	82.2	15.1	5.7	269000	14.86	1	126
467	67	1	1	1	2	1	1	1	2	2	2	1	1	0	0	1	1	1	1	1	1	1	1	1	1	1	1	1	0	1	11	47			1	136		1.18		14.3	5.03	4.1	65.1	19.5	14.5	106000	2.2	1	343
468	73	2	1	1	1	1	1	1	1	2	1	2	2	0	0	1	1	1	1	1	1	1	1	1	1	1	1	1	0	1	4	10	7	0		1042		0.74		5.7	1.88	1.5	13.1	58.9	26.7	88000	23.93	1	386
469	73	1	1	1	2	2	1	1	1	1	1	1	1	0	0	1	1	1	1	1	1	1	1	1	1	1	1	1	0	1	0	22	10	0	2	500		0.97		14.5	4.9	9.1	85.9	6.6	6.7	250000	6.51	1	257
470	66	1	1	1	1	1	1	1	1	2	1	1	1	0	0	1	1	1	1	1	1	1	1	1	1	1	1	1	0	0	0	22	10	0	1	405		1.24		14.9	4.6	6.5	87.6	3.7	8.2	158000	18	1	294
471	47	1	1	1	1	2	1	1	2	2	1	2	1	0	0	1	1	1	1	1	1	1	1	1	1	1	1	1	0	0	0	19	15	0	1	270		0.7		15.1	4.68	8.2	74.7	10.5	14.5	133000	11.56	1	269
472	84	2	1	2	1	2	1	1	1	2	2	1	1	0	0	1	1	1	1	1	1	1	1	1	1	1	1	1	0	1	6	8	5	0	1	404		0.85		12.5	4.07	3.2	75.4	11.3	13.1	121000	2.63	1	304
473	66	1	1	1	1	1	1	1	1	2	1	1	1	0	0	1	1	1	1	1	1	1	1	1	1	1	1	1	0	1	21	29	29	0	1	9523		1.27		14.3	4.51	7	77.8	11	9.8	309000	15.07	1	185
474	72	1	1	1	1	2	1	1	1	2	2	1	1	0	0	1	1	1	1	1	1	1	1	1	1	1	1	1	0	1	7	7	5	0	1	323		1.04		14.2	4.45	13.1	88.4	5.6	6	233000	13.7	1	177
475	71	1	1	2	2	2	1	1	2	2	2	2	2	0	0	1	1	1	1	1	1	1	1	1	1	1	1	1	0	1	18	19	19	0	1	171		0.68		15.4	5.25	4.1	69	19.7	11	156000	2.63	1	227
476	54	2	1	1	2	2	1	1	1	1	1	1	1	0	0	1	1	1	1	1	1	1	1	1	1	1	1	1	0	0	0	4				388		0.85		15.6	4.77	11.9	87.1	9.2	3.2	261000	24.25	1
[truncated: 5 more columns]
